# Supplementary material for: Enhanced antibacterial activity with increasing P doping ratio in CQDs
Source: Royal Society of Chemistry journal article supplement (doi:10.1039/d2ra04809d), 2022-01-01
Supplement: d2ra04809d1.pdf [file d2ra04809d1.pdf]

## Electronic Supplementary Information (ESI)

### Enhanced antibacterial activity with increasing P doping ratio in CQDs

Shuiqin Chai,<sup>a, b, \*</sup> Lijia Zhou,<sup>b</sup> Yuting Chi,<sup>b</sup> Linshuo Chen,<sup>b</sup> Shuchen Pei,<sup>a, b</sup> Bin Chen<sup>c\*</sup>

<sup>a</sup> Chongqing Key Laboratory of Industrial Fermentation Microorganism, Chongqing University of Science and Technology, Chongqing 401331, P. R. China.

<sup>b</sup> College of Chemistry and Chemical Engineering, Chongqing University of Science and Technology, Chongqing 401331, P. R. China.

<sup>c</sup> Chongqing Key Laboratory of Non-linear Circuit and Intelligent Information Processing, College of Electronic and Information Engineering, Southwest University, Chongqing 400715, P.R. China.

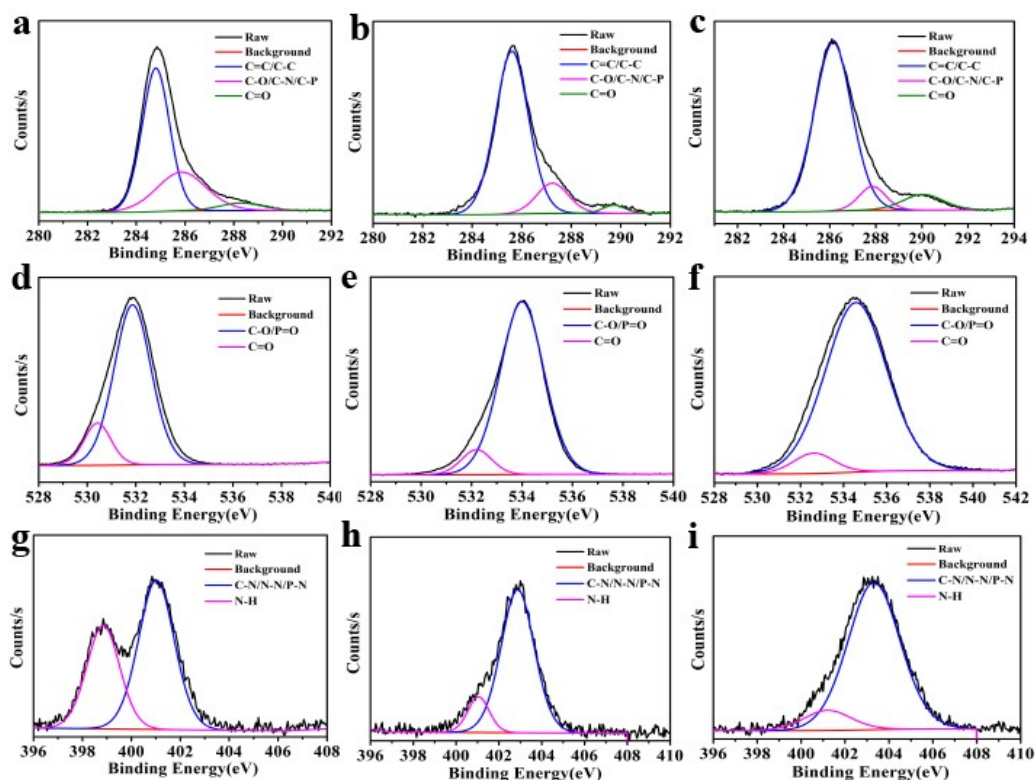

**Fig. S1** The high-resolution C 1s (a–c), O 1s (d–f), N 1s (g–i) XPS spectra of CQDs-1 (a, d, g), CQDs-2 (b, e, h) and CQDs-3 (c, f, i).

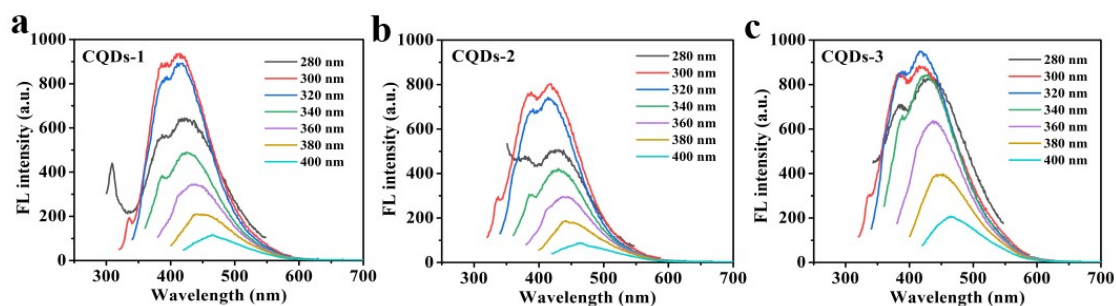

**Fig. S2** FL emission spectra of CQDs-1 (a), CQDs-2 (b) and CQDs-3 (c) under the excitation of 280–400 nm light beam.

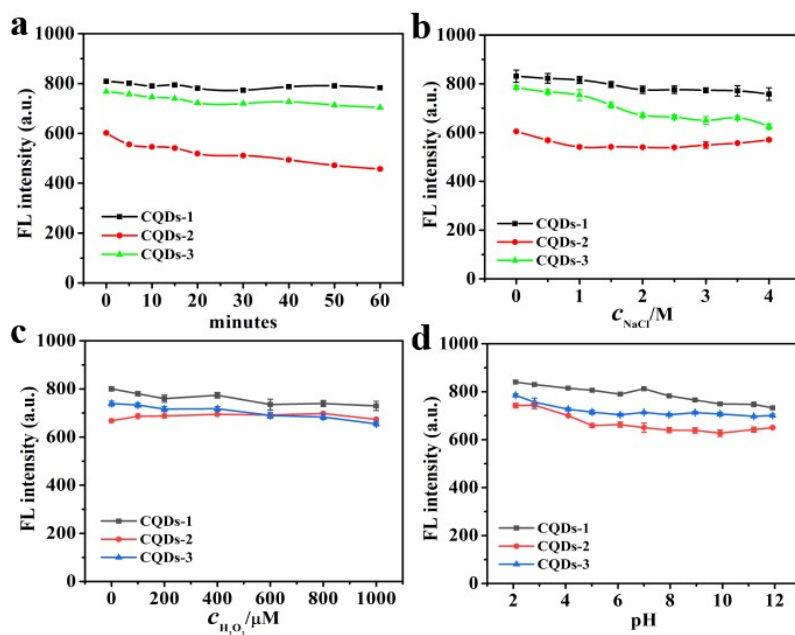

**Fig. S3** Fluorescent spectra of CQDs in different incubation time (a), different concentration of NaCl (b) and H<sub>2</sub>O<sub>2</sub> (c), pH solutions (d).

**Table a** OD values of *E. coli* treated with different concentrations of CQDs-1, CQDs-2, CQDs-3

| $c_{\text{CQDs}}$<br>(mg/mL) | CQDs-1 |       |       | CQDs-2 |       |       | CQDs-3 |       |       | Blank<br>group | Negative<br>group |
|------------------------------|--------|-------|-------|--------|-------|-------|--------|-------|-------|----------------|-------------------|
| 2.86                         | 0.042  | 0.046 | 0.047 | 0.048  | 0.046 | 0.050 | 0.053  | 0.050 | 0.052 | 0.053          | 0.545             |
| 1.43                         | 0.043  | 0.047 | 0.048 | 0.052  | 0.047 | 0.050 | 0.050  | 0.051 | 0.049 | 0.045          | 0.580             |
| 0.71                         | 0.036  | 0.038 | 0.036 | 0.040  | 0.040 | 0.044 | 0.044  | 0.046 | 0.046 | 0.038          | 0.468             |
| 0.51                         | 0.511  | 0.556 | 0.571 | 0.045  | 0.043 | 0.047 | 0.049  | 0.050 | 0.051 |                |                   |

|      |       |       |       |       |       |       |       |       |       |
|------|-------|-------|-------|-------|-------|-------|-------|-------|-------|
| 0.36 | 0.579 | 0.615 | 0.634 | 0.588 | 0.588 | 0.599 | 0.051 | 0.057 | 0.057 |
| 0.18 | 0.519 | 0.566 | 0.563 | 0.571 | 0.615 | 0.633 | 0.046 | 0.046 | 0.045 |
| 0.16 | 0.463 | 0.487 | 0.492 | 0.524 | 0.574 | 0.555 | 0.581 | 0.565 | 0.622 |

Table b OD values of *Sh. flexneri* treated with different concentrations of CQDs-1, CQDs-2, CQDs-3

| $c_{\text{CQDs}}$<br>(mg/mL) | CQDs-1 |       |       | CQDs-2 |       |       | CQDs-3 |       |       | Blank<br>group | Negative<br>group |
|------------------------------|--------|-------|-------|--------|-------|-------|--------|-------|-------|----------------|-------------------|
| 2.86                         | 0.056  | 0.056 | 0.066 | 0.071  | 0.06  | 0.062 | 0.063  | 0.06  | 0.061 | 0.047          | 0.534             |
| 1.43                         | 0.058  | 0.056 | 0.06  | 0.067  | 0.066 | 0.069 | 0.072  | 0.068 | 0.069 | 0.058          | 0.504             |
| 0.71                         | 0.042  | 0.042 | 0.041 | 0.049  | 0.049 | 0.093 | 0.053  | 0.049 | 0.054 | 0.064          | 0.489             |
| 0.51                         | 0.227  | 0.184 | 0.189 | 0.052  | 0.052 | 0.051 | 0.062  | 0.055 | 0.06  |                |                   |
| 0.36                         | 0.361  | 0.362 | 0.385 | 0.209  | 0.182 | 0.185 | 0.066  | 0.061 | 0.062 |                |                   |
| 0.18                         | 0.452  | 0.411 | 0.449 | 0.371  | 0.43  | 0.449 | 0.061  | 0.061 | 0.063 |                |                   |
| 0.16                         | 0.477  | 0.451 | 0.51  | 0.475  | 0.464 | 0.453 | 0.255  | 0.248 | 0.247 |                |                   |
| 0.12                         | 0.518  | 0.453 | 0.491 | 0.47   | 0.485 | 0.478 | 0.46   | 0.415 | 0.433 |                |                   |

Table c OD values of *P. aeruginosa* treated with different concentrations of CQDs-1, CQDs-2, CQDs-3

| $c_{\text{CQDs}}$<br>(mg/mL) | CQDs-1 |       |       | CQDs-2 |       |       | CQDs-3 |       |       | Blank<br>group | Negative<br>group |
|------------------------------|--------|-------|-------|--------|-------|-------|--------|-------|-------|----------------|-------------------|
| 2.86                         | 0.055  | 0.056 | 0.058 | 0.061  | 0.059 | 0.06  | 0.062  | 0.066 | 0.059 | 0.084          | 0.955             |
| 1.43                         | 0.056  | 0.059 | 0.06  | 0.062  | 0.068 | 0.064 | 0.062  | 0.069 | 0.063 | 0.058          | 0.924             |
| 0.71                         | 0.041  | 0.044 | 0.046 | 0.045  | 0.047 | 0.049 | 0.049  | 0.053 | 0.05  | 0.072          | 0.961             |
| 0.51                         | 0.309  | 0.296 | 0.311 | 0.050  | 0.054 | 0.058 | 0.057  | 0.059 | 0.06  |                |                   |
| 0.36                         | 0.881  | 0.892 | 0.852 | 0.341  | 0.348 | 0.361 | 0.064  | 0.065 | 0.065 |                |                   |
| 0.18                         | 0.909  | 0.853 | 0.932 | 0.908  | 0.956 | 0.972 | 0.063  | 0.073 | 0.067 |                |                   |
| 0.16                         | 0.989  | 0.962 | 0.981 | 0.955  | 1.015 | 1.023 | 0.433  | 0.434 | 0.454 |                |                   |
| 0.12                         | 0.982  | 0.945 | 0.987 | 0.924  | 0.979 | 0.962 | 0.96   | 0.916 | 0.856 |                |                   |

Table d OD values of *S. aureus* treated with different concentrations of CQDs-1, CQDs-2, CQDs-3

| $c_{\text{CQDs}}$<br>(mg/mL) | CQDs-1 |       |       | CQDs-2 |       |       | CQDs-3 |       |       | Blank<br>group | Negative<br>group |
|------------------------------|--------|-------|-------|--------|-------|-------|--------|-------|-------|----------------|-------------------|
| 2.86                         | 0.048  | 0.045 | 0.048 | 0.047  | 0.053 | 0.050 | 0.053  | 0.050 | 0.057 | 0.048          | 0.325             |
| 1.43                         | 0.047  | 0.047 | 0.048 | 0.051  | 0.049 | 0.051 | 0.052  | 0.063 | 0.071 | 0.044          | 0.371             |
| 0.71                         | 0.039  | 0.039 | 0.039 | 0.044  | 0.043 | 0.047 | 0.079  | 0.044 | 0.053 | 0.042          | 0.328             |
| 0.51                         | 0.227  | 0.267 | 0.253 | 0.042  | 0.044 | 0.052 | 0.053  | 0.048 | 0.060 |                |                   |
| 0.36                         | 0.322  | 0.298 | 0.282 | 0.282  | 0.288 | 0.265 | 0.056  | 0.048 | 0.065 |                |                   |
| 0.18                         | 0.324  | 0.311 | 0.288 | 0.290  | 0.320 | 0.308 | 0.051  | 0.047 | 0.055 |                |                   |
| 0.16                         | 0.377  | 0.298 | 0.293 | 0.307  | 0.286 | 0.290 | 0.266  | 0.311 | 0.384 |                |                   |

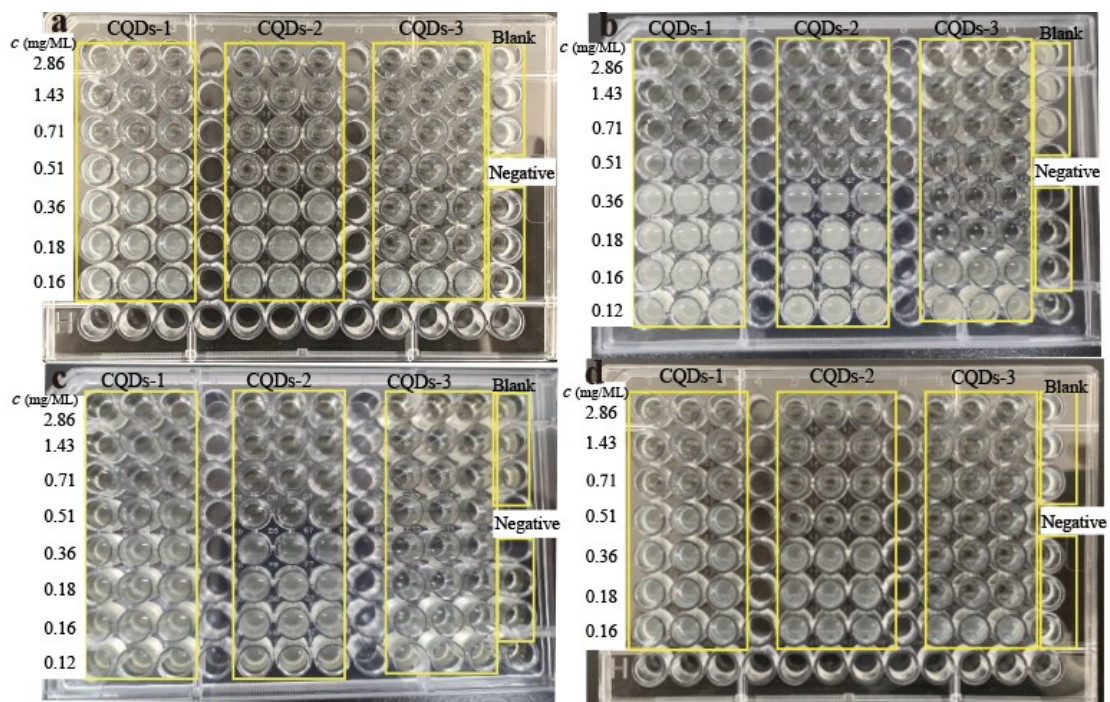

**Fig. S4** The antibacterial ability of CQDs-1, CQDs-2 and CQDs-3 on *E. coli* (a), *Sh. Flexneri* (b), *P. aeruginosa* (c) and *S. aureus* (d).

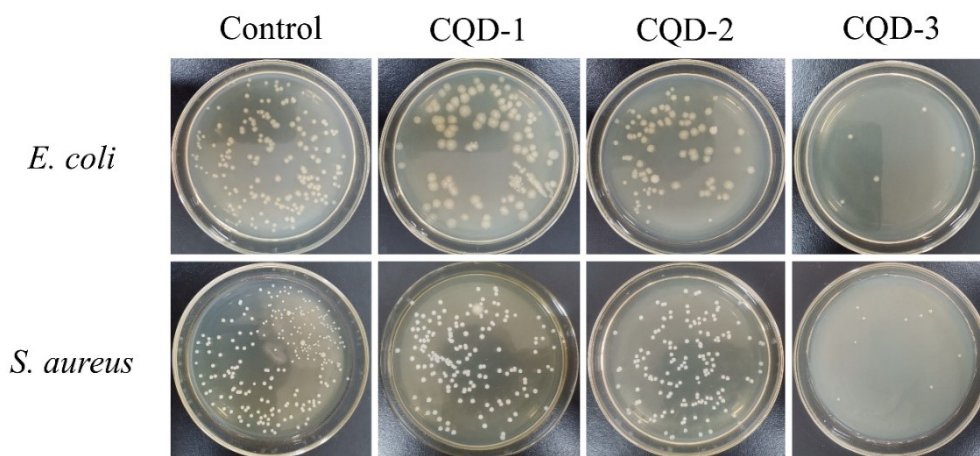

**Fig. S5** Typical photographs of *E. coli* and *S. aureus* after treatment with CQDs-1, CQDs-2 and CQDs-3 on LB nutrient agar medium for 24 h.
